# Supplementary material for: Prevalence of Women with Dense Breasts in Korea: Results from a Nationwide Cross-sectional Study
Source: PubMed Central journal article supplement — Cancer Res Treat. 2019 Jan 29;51(4):1295–301. doi: 10.4143/crt.2018.297 (PMC6790853; doi:10.4143/crt.2018.297), 2019-01-29
Supplement: crt-2018-297-suppl.pdf [file crt-2018-297-suppl.pdf]

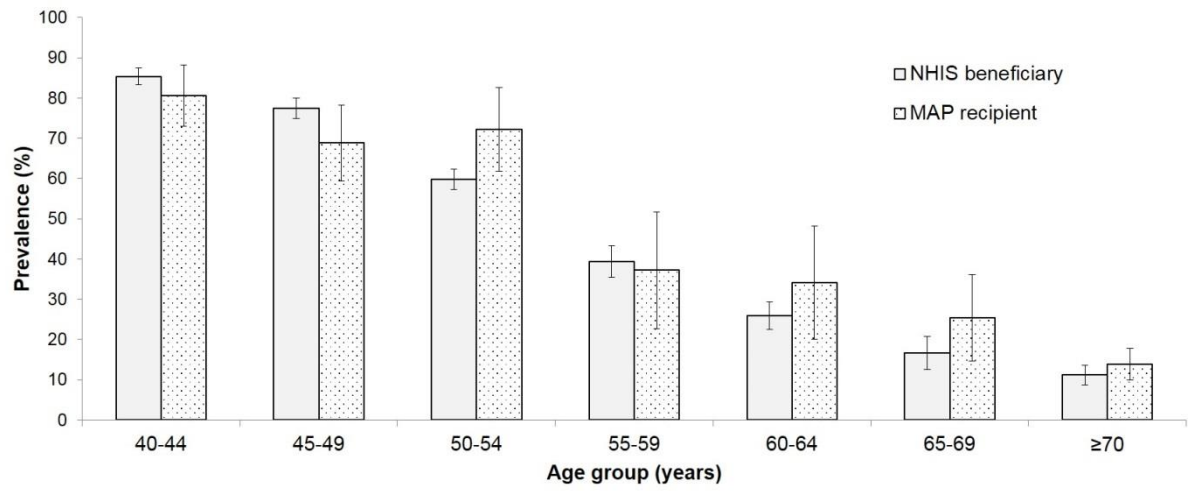

**S1 Fig.** Comparison of the prevalences of dense breasts according to the health insurance status. NHIS, National Health Insurance Service; MAP, Medical Aid Program.
